# Supplementary material for: Biometabolites of Citrus unshiu Peel Enhance Intestinal Permeability and Alter Gut Commensal Bacteria
Source: MDPI journal article supplement (doi:10.3390/nu15020319), 2023-01-09
Supplement: s1 [file s1]

# **Biometabolites of *Citrus unshiu* Peel Enhance Intestinal Permeability and Alter Gut Commensal Bacteria**

**Se-Hui Lee <sup>1</sup>, Dongju Seo <sup>1</sup>, Kang-Hee Lee <sup>1</sup>, So-Jung Park <sup>1</sup>, Sun Park <sup>1</sup>, Hyeyun Kim <sup>1</sup>, Taekyung Kim <sup>2</sup>, In Hwan Joo <sup>3</sup>, Jong-Min Park <sup>3</sup>, Yun-Hwan Kang <sup>4</sup>, Gah-Hyun Lim <sup>1</sup>, Dong Hee Kim <sup>3</sup> and Jin-Young Yang <sup>1,\*</sup>**

<sup>1</sup> Mucosal Immunology Laboratory, Department of Integrated Biological Science, Pusan National University, Busan 46241, Republic of Korea; two\_hui@pusan.ac.kr (S.-H.L.); csa83201@pusan.ac.kr (D.S.); rkdgm19056@pusan.ac.kr (K.-H.L.); ahejr26@naver.com (S.-J.P.); sun980610@pusan.ac.kr (S.P.); kelly5060@pusan.ac.kr (H.K.); ghlim16@pusan.ac.kr (G.-H.L.)

<sup>2</sup> Department of Biology Education, Pusan National University, Busan 46241, Republic of Korea; taekim@pusan.ac.kr

<sup>3</sup> Department of Pathology, College of Korean Medicine, Daejeon University, Daejeon 34520, Republic of Korea; jooih@dju.kr (I.H.J.); jmpark@dju.kr (J.-M.P.); dhkim@dju.kr (D.H.K.)

<sup>4</sup> Department of Industry Promotion, National Institute for Korean Medicine Development, Geongsan 38540, Republic of Korea; k\_yunhwan@nikom.or.kr

\* Correspondence: jyyang99@pusan.ac.kr; Tel.: +82-51-510-2286; Fax: +82-51-581-2962

## Supplementary Table

**Table S1. List of commensal bacteria (species).** All individual gut microbes shown in the pie chart in Figure 6D are arranged in order of their frequency here.

|                                                                                                                             |                                                                                                                              |                                                                                                                                  |
|-----------------------------------------------------------------------------------------------------------------------------|------------------------------------------------------------------------------------------------------------------------------|----------------------------------------------------------------------------------------------------------------------------------|
|  <i>Alistioides outredinis</i>             |  <i>Alistioides onderdonkii</i>             |  <i>Nealecta timonensis</i>                     |
|  <i>Hunotatella xylanolytica</i>           |  <i>Parabacteroides goldsteinii</i>         |  <i>Ruminiclostridium cellulolyticum</i>        |
|  <i>Muribaculum intestinale</i>            |  <i>Lawsonibacter asaccharolyticus</i>      |  <i>Anaerosporeobacter mobilis</i>              |
|  <i>Kineothrix alysoides</i>               |  <i>Oscillibacter valericigenes</i>         |  <i>Anaerostipes butyraticus</i>                |
|  <i>Alistipes seneqalensis</i>             |  <i>[Clostridium] populeti</i>              |  <i>Anaerotruncus rubiinfantis</i>              |
|  <i>Flintibacter butyricus</i>             |  <i>Enterocloster aldenensis</i>            |  <i>Hydrogenoanaerobacterium saccharovorans</i> |
|  <i>Lacrimispora saccharolytica</i>        |  <i>Petrocella atlantisensis</i>            |  <i>Butyrivibrio faecihominis</i>               |
|  <i>Mucispirillum schaedleri</i>           |  <i>Parabacteroides merdae</i>              |  <i>Roseburia faecis</i>                        |
|  <i>Christensenella massiliensis</i>       |  <i>Gracilibacter thermotolerans</i>        |  <i>Parasutterella excrementihominis</i>        |
|  <i>Duncaniella freteri</i>                |  <i>Vallitalea prouvensis</i>               |  <i>Acetivibrio straminisolvans</i>             |
|  <i>Lacrimispora aerotolerans</i>          |  <i>Parabacteroides distasonis</i>          |  <i>[Bacteroides] pectinophilus</i>             |
|  <i>Phocaeicola massiliensis</i>           |  <i>Anaeroplasmata abactoclasticum</i>      |  <i>Alkalibacter saccharofermentans</i>         |
|  <i>Oscillibacter ruminantium</i>         |  <i>Phocaea massiliensis</i>               |  <i>Enterocloster asparaqiformis</i>           |
|  <i>Christensenella hongkongensis</i>    |  <i>Anaerotruncus propionicum</i>         |  <i>Lactobacillus johnsonii</i>               |
|  <i>Lactobacillus apodemi</i>            |  <i>[Clostridium] viride</i>              |  <i>Lachnoclostridium pacaense</i>            |
|  <i>Clostridium cellulovorans</i>        |  <i>[Clostridium] polysaccharolyticum</i> |  <i>Desulfotobacterium hafniense</i>          |
|  <i>Acetivibrio thermocellus</i>         |  <i>Eisenbergiella massiliensis</i>       |  <i>[Eubacterium] siraeum</i>                 |
|  <i>Vampirovibrio chlorellavorus</i>     |  <i>Bacteroides nordii</i>                |  <i>Caecibacterium sporiformans</i>           |
|  <i>Acetatifactor muris</i>              |  <i>Desulfovibrio desulfuricans</i>       |  <i>Eubacterium xylanophilum</i>              |
|  <i>Butyrivibrio phoceensis</i>          |  <i>Maoeeibacillus indolicus</i>          |  ETC (<0.01%)                                 |
|  <i>Intestinimonas butyriciproducens</i> |  <i>Anaerotaenia torta</i>                |                                                                                                                                  |

**Table S2. List of specific primer sets used for Real-Time PCR in this study.**

| <b>Target Gene</b> | <b>Forward Sequence</b> | <b>Reverse Sequence</b> |
|--------------------|-------------------------|-------------------------|
| <i>GAPDH</i>       | CAATGACCCCTTCATTGACC    | GACAAGCTTCCCGTTCTCAG    |
| <i>Occludin</i>    | CCTCCAATGGCAAAGTGAAT    | CTCCCCACCTGTCGTGTAGT    |
| <i>E-cadherin</i>  | CACCTGGAGAGAGGCCATGT    | TGGGAAACATGAGCAGCTCT    |
| <i>Claudin-2</i>   | TATGTGGTGCCAGCATTGT     | TCATGCCCACCACAGAGATA    |
| <i>ZO-1</i>        | CCACCTCTGTCCAGCTCTTC    | CACCGGAGTGATGGTTTTCT    |
